# Supplementary material
Source: Springer Nature journal article supplement (https://www.springermedizin.de/resource/supplementary/12873_2013_208_MOESM6_ESM.pdf/9431650)

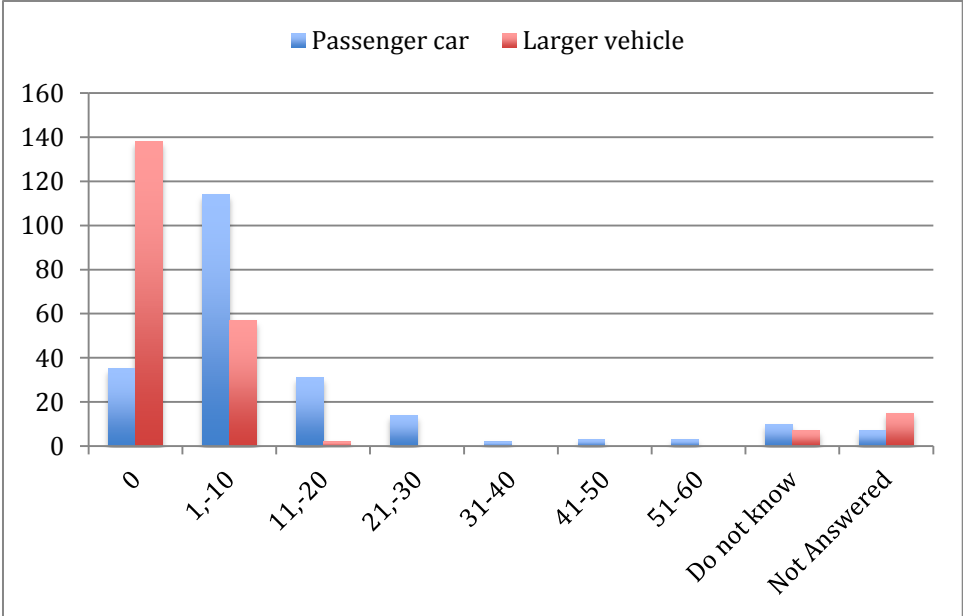

Figure 11.

Supplement: MOESM6 [file 9431650]
